# Supplementary material for: Variation in neophobia among cliff swallows at different colonies
Source: PLOS journal article supplement (doi:10.1371/journal.pone.0226886), 2019-12-23
Supplement: S6 (10.1371/journal.pone.0226886.s006) [file journal.pone.0226886.s006]

**S1 Table: Univariate linear mixed model analysis of latency to enter a nest bearing a novel stimulus, a measure of neophobia in cliff swallows, in relation to potential life history and environmental predictor variables.**

| Covariate                                  | Estimate | SE     | t-value |
|--------------------------------------------|----------|--------|---------|
| Intercept                                  | 2.2617   | 1.0288 | 2.198   |
| Sex <sup>a</sup>                           | -0.3029  | 0.4969 | -0.610  |
| Trial rank order 2 <sup>b</sup>            | -2.2195  | 0.4290 | -5.174  |
| Trial rank order 3 <sup>b</sup>            | -2.8804  | 0.4872 | -5.912  |
| Trial rank order 4 <sup>b</sup>            | -2.6596  | 0.6463 | -4.115  |
| Temperature (°C)                           | -0.2109  | 0.1811 | -1.165  |
| Wind speed (m/sec)                         | 0.0379   | 0.1752 | 0.216   |
| Extent of sunshine (watts/m <sup>2</sup> ) | 0.1480   | 0.1782 | 0.831   |
| Days since 1 <sup>st</sup> egg laid        | 0.3063   | 0.2573 | 1.190   |

Number of observations: 533; Bird ID and colony Site ID were modelled as a random effects.

$n_{\text{ind.}} = 160$  and  $n_{\text{sites}} = 3$ .

<sup>a</sup> In relation to female as baseline.

<sup>b</sup> In relation to trial rank order 1 as baseline.
