# Supplementary material for: Variation in neophobia among cliff swallows at different colonies
Source: PLOS journal article supplement (doi:10.1371/journal.pone.0226886), 2019-12-23
Supplement: S9 (10.1371/journal.pone.0226886.s009) [file journal.pone.0226886.s009]

**S4 Table: Univariate generalized linear mixed model analysis of the number of captures, a measure of neophobia in cliff swallows, in relation to sex.**

| Covariate        | Estimate | SE    | Z-value | p-value |
|------------------|----------|-------|---------|---------|
| Intercept        | 0.249    | 0.132 | 1.882   | 0.0598  |
| Sex <sup>a</sup> | -0.035   | 0.156 | -0.222  | 0.8242  |

Number of behavioral observations: 160; colony Site ID was modelled as a random effect,  $n_{\text{sites}} = 3$ .

<sup>a</sup> In relation to female as baseline.
